# Supplementary material for: Hybrid Materials with Antimicrobial Properties Based on Hyperbranched Polyaminopropylalkoxysiloxanes Embedded with Ag Nanoparticles
Source: MDPI journal article supplement (doi:10.3390/pharmaceutics15030809), 2023-03-02
Supplement: s1 [file s1]

# Hybrid materials with antibacterial properties based on hyperbranched polyaminopropylalkoxysiloxanes embedded with Ag nanoparticles

Alexander Vasil'kov, Dmitry Migulin, Alexander Naumkin, Ilya Volkov, Ivan Butenko, Alexandre Golub, Vera Sadykova and Aziz Muzafarov.

## Supporting Information

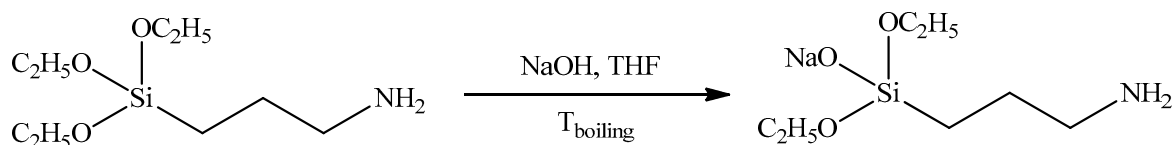

**Figure S1.** Scheme of synthesis of monosodium salts of (3-aminopropyl)diethoxysilanes.

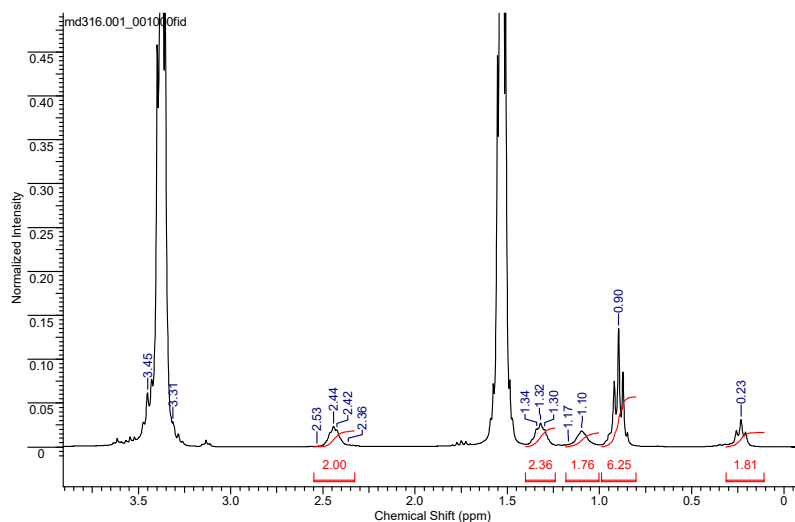

**Figure S2.** <sup>1</sup>H NMR Spectral data of Sodiumoxy-(3-Aminopropyl)diethoxysilane.

<sup>1</sup>H NMR (300 MHz, THF)  $\delta$ : 2.53-2.36 ppm (m, 2H,  $-\text{CH}_2\text{-NH}_2$ ), 1.34-1.30 ppm (m, 2H,  $-\text{CH}_2\text{-CH}_2\text{-NH}_2$ ), 0.23 ppm (t, 2H,  $-\text{Si-CH}_2-$ ,  $J = 7.4$  Hz), 0.9 ppm (t, 6H,  $\text{CH}_3\text{CH}_2\text{O-}$ ,  $J = 7$  Hz), 3.45-3.31 ppm (m, 4H,  $\text{CH}_3\text{CH}_2\text{O-}$ ) 1.17-1.1 ppm (m, 2H,  $-\text{NH}_2$ )

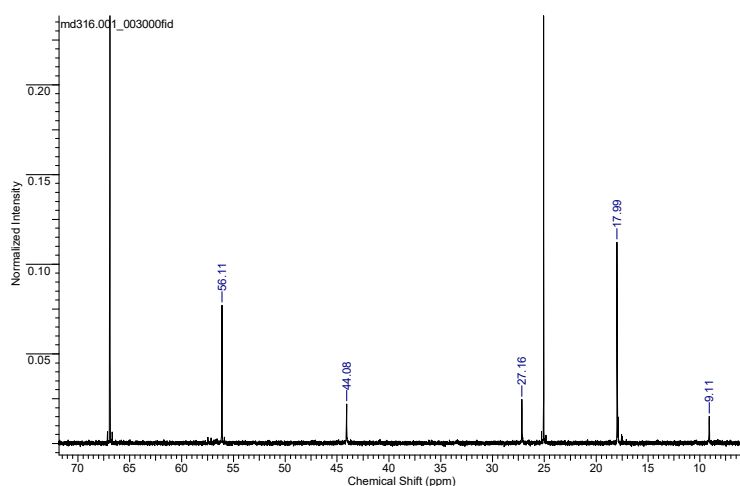

**Figure S3.** <sup>13</sup>C NMR Spectral data of Sodiumoxy-(3-Aminopropyl)diethoxysilane.

<sup>13</sup>C NMR (THF)  $\delta$ : 9.11 ppm (-Si-CH<sub>2</sub>-CH<sub>2</sub>-), 27.16 ppm (-Si-CH<sub>2</sub>-CH<sub>2</sub>-), 56.11 ppm (-CH<sub>2</sub>-CH<sub>2</sub>-NH<sub>2</sub>), 44.08 (CH<sub>3</sub>CH<sub>2</sub>O-), 17.99 ppm (CH<sub>3</sub>CH<sub>2</sub>O-).

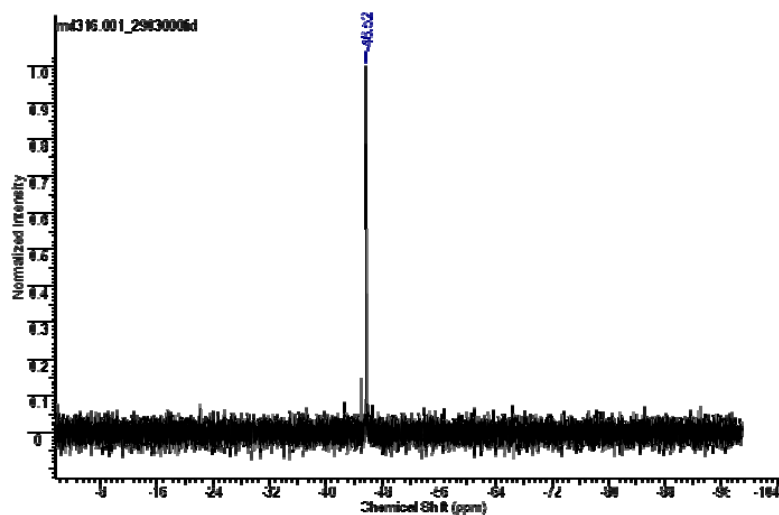

**Figure S4.** <sup>29</sup>Si NMR Spectral data of Sodiumoxy-(3-Aminopropyl)diethoxysilane.

<sup>29</sup>Si (THF),  $\delta$ : -46.52 ppm.

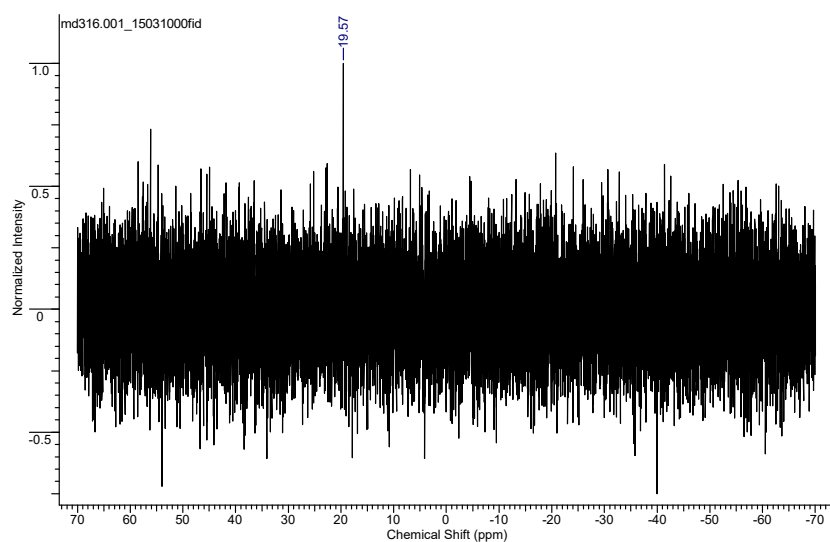

**Figure S5.**  $^{15}\text{N}$  NMR Spectral data of Sodiumoxy-(3-Aminopropyl)diethoxysilan.

$^{15}\text{N}$  (THF),  $\delta$ : 19.6 ppm ( $-\text{NH}_2$ ).

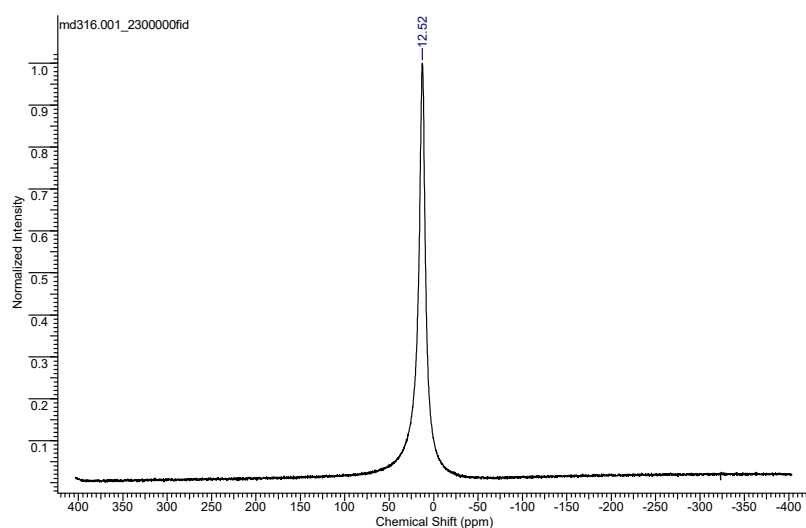

**Figure S6.**  $^{23}\text{Na}$  NMR Spectral data of Sodiumoxy-(3-Aminopropyl)diethoxysilane.

$^{23}\text{Na}$  (THF) 12.5 ppm.

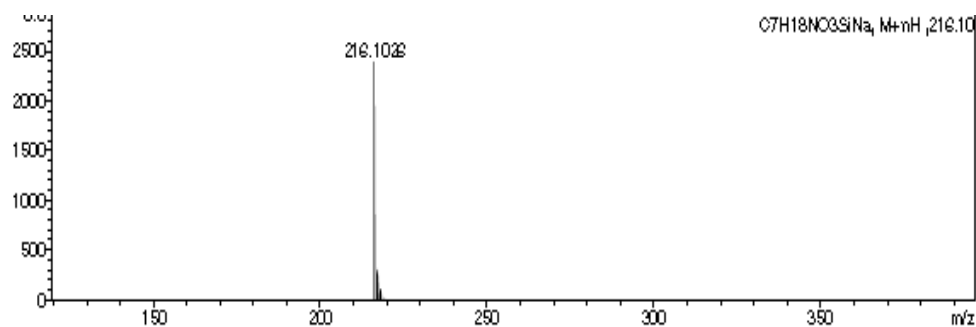

**Figure S7.** Mass spectra of Sodiumoxy-(3-Aminopropyl)diethoxysilane: HRMS calcd for  $C_7H_{18}NNaO_3Si$ : 216.1026; found:  $[M+nH] = 216.1024$ .

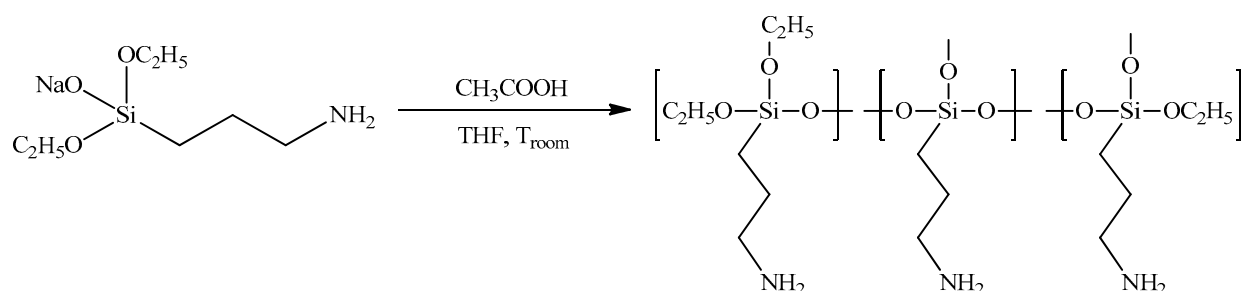

**Figure S8.** Scheme of synthesis of hyperbranched polyaminopropylethoxysiloxane (HBPAPES)

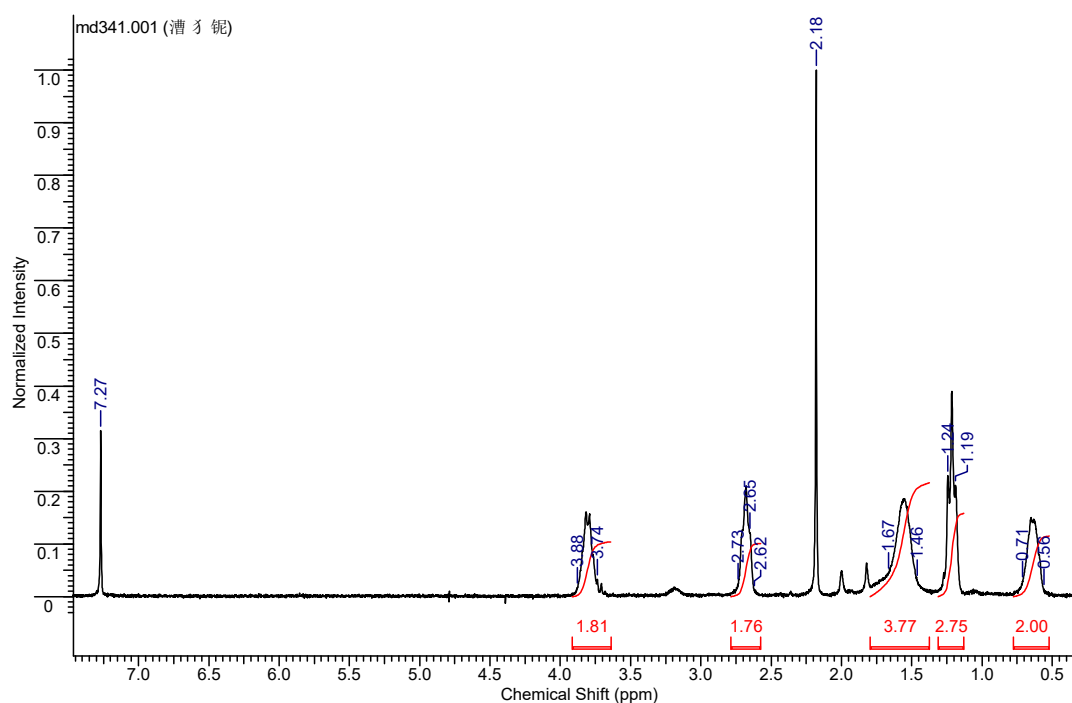

**Figure S9.**  $^1H$  NMR Spectral data of polyaminopropylethoxysiloxane.

$^1H$  NMR (300 MHz,  $CDCl_3$ )  $\delta$ : 2.73-2.62 ppm (m, 2H,  $-\underline{CH}_2-NH_2$ ), 1.67-1.46 ppm (m, 2H,  $-\underline{CH}_2-CH_2-NH_2$ ), 0.71-0.56 ppm (m, 2H,  $-\underline{Si}-CH_2-$ ), 1.24-1.19 ppm (m, 6H,  $CH_3CH_2O-$ ), 3.88-3.74 ppm (m, 4H,  $CH_3CH_2O-$ ), 1.67-1.46 ppm (m, 2H,  $-NH_2$ )

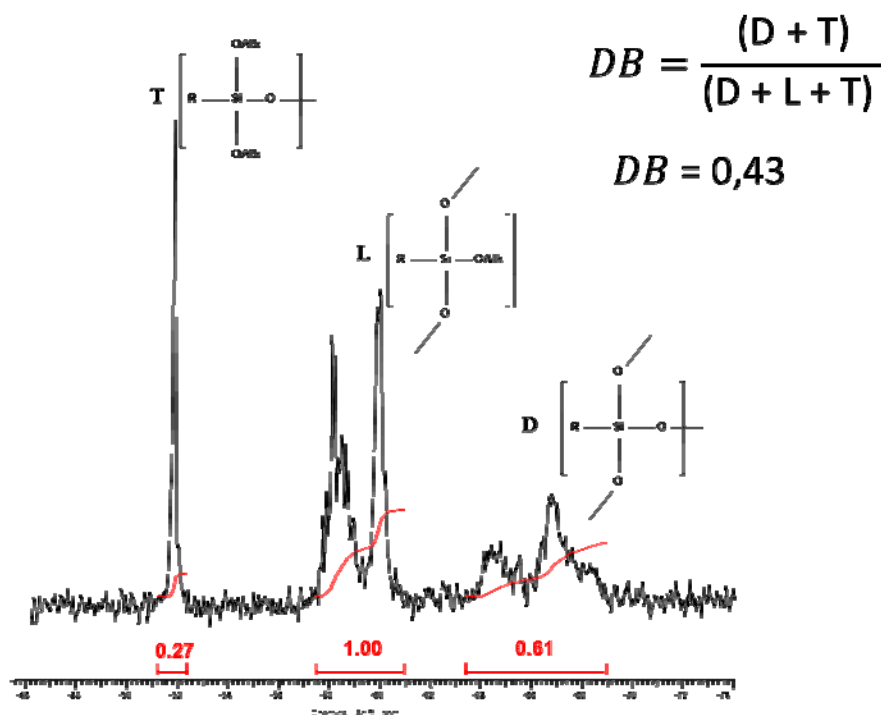

**Figure S10.** Degree of branching (DB) and  $^{29}\text{Si}$ -NMR Spectral data of polyaminopropylethoxysiloxane with the addition of paramagnetic relaxation agent Chromium (III) Acetylacetonate.

$^{29}\text{Si}$  (THF),  $\delta$ : 51.89-52.3 ppm (m, R-Si(OCH<sub>3</sub>)<sub>2</sub>O-), 57.93-60.41 (m, R-Si(OCH<sub>3</sub>)(O-)<sub>2</sub>), 64.3-68.48 (m, R-Si(O-)<sub>3</sub>).

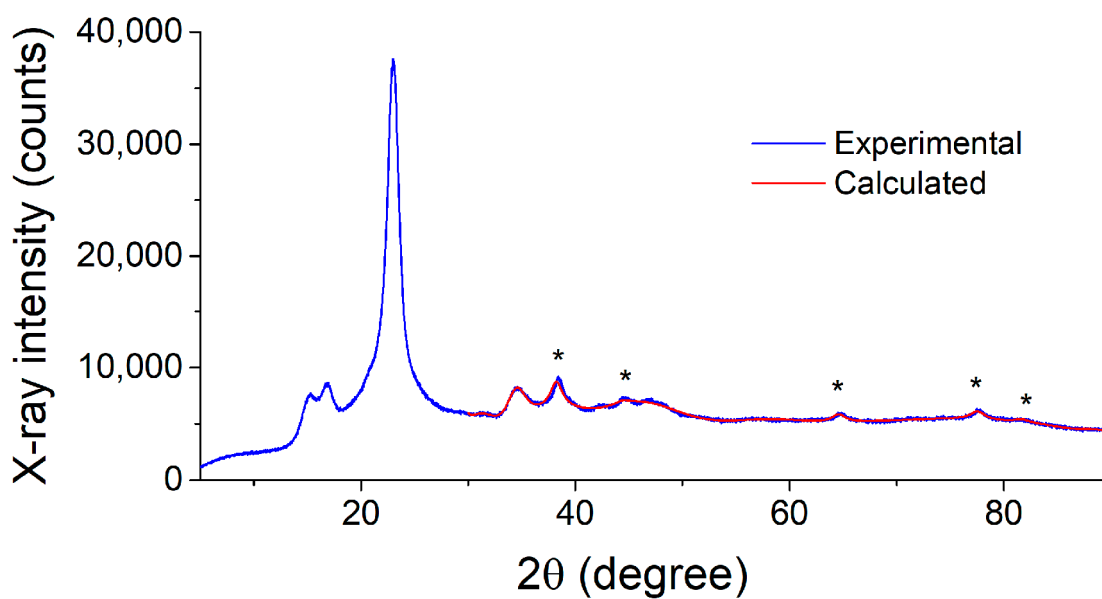

**Figure S11.** PXRD pattern of the Ag NPs/HBPAPES/cotton composite and its fit evidencing the presence of Ag nanoparticles. The reflections of metallic silver are marked by asterisks.

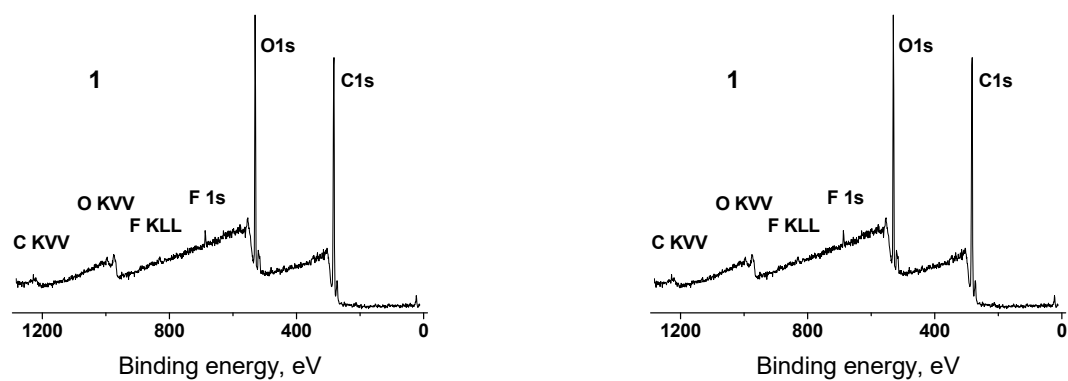

**Figure S12.** Survey XPS spectra of the cotton (1) and Ag NPs/HBPAPES/cotton (2) samples.

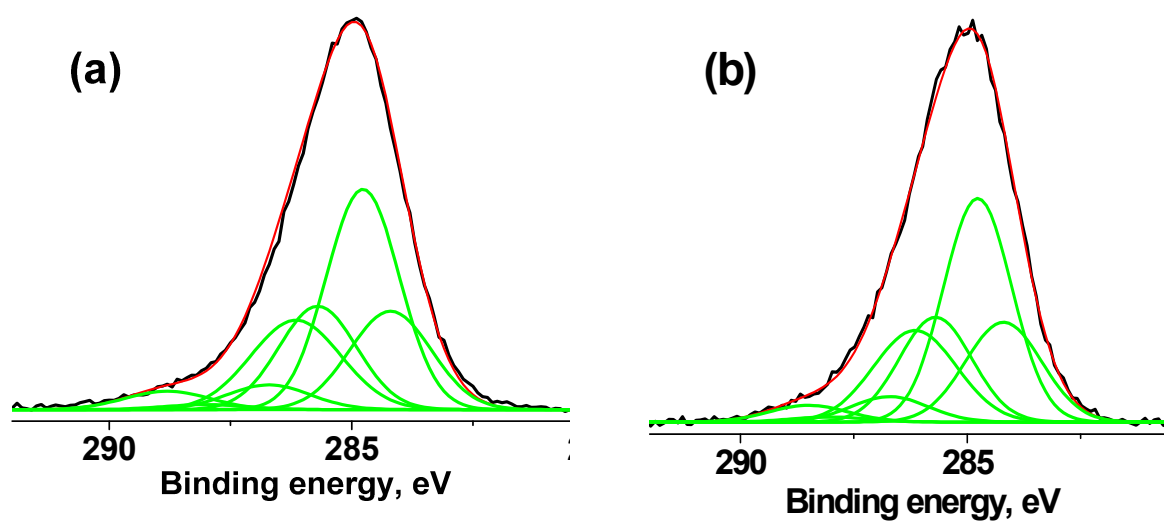

**Figure S13.** The C 1s spectra of the Ag NPs/HBPAPES/cotton sample: measured at  $U_b=0$  (a) and 7 V (b) fitted in accordance to chemical structure formulas of silane and cotton.

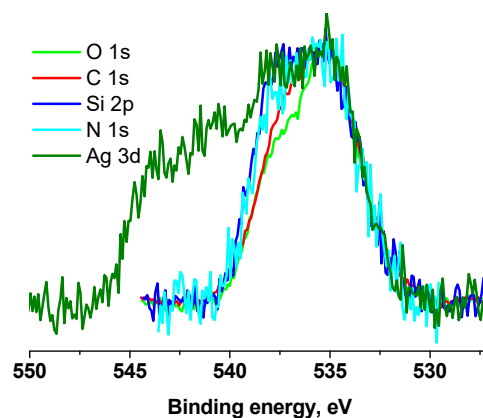

**Figure S14.** The O 1s, C 1s, Si 2p, N 1s and Ag 3d spectra of the Ag NPs/HBPAPES/cotton sample measured at  $U_b = -7$  V. The figure demonstrates a coincidence of low-energy edges of all spectra which evidences on similar physical nature of low energy states.

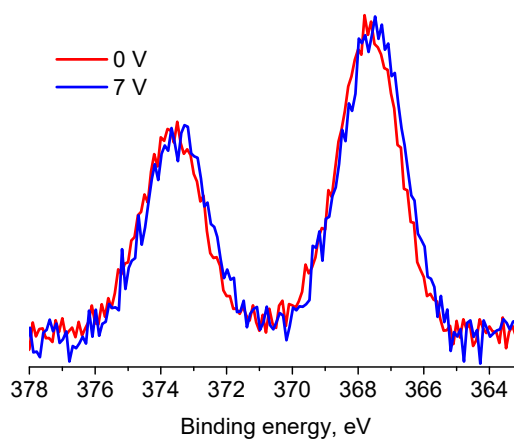

**Figure S15.** The Ag 3d spectra of the Ag NPs/HBPAPES/cotton sample measured at  $U_b = 0$  V and  $U_b = 7$  V.

**Table S1.** Quantification data (at. %) of the cotton and Ag NPs/HBPAPES/cotton samples recorded at various bias voltages

| Sample                | U <sub>b</sub> | C    | O    | N   | Ag  | Si  |
|-----------------------|----------------|------|------|-----|-----|-----|
| Cotton                | -7 V           | 66.1 | 33.9 |     |     |     |
|                       | 0 V            | 67.3 | 32.7 |     |     |     |
|                       | 7 V            | 67.8 | 32.2 |     |     |     |
| Ag NPs/HBPAPES/cotton | -7 V           | 74.1 | 18.6 | 2.7 | 0.6 | 4.1 |
|                       | 0 V            | 73.4 | 19.1 | 2.7 | 0.6 | 4.2 |
|                       | 7 V            | 74.9 | 17.9 | 2.4 | 0.5 | 4.3 |

**Table S2.** Parameters of components in C 1s and O 1s photoelectron spectra of the cotton sample: E<sub>b</sub> – binding energy, W – peak width and I<sub>rel</sub> – relative intensity.

|                |                     | C 1s    |        |        |        | O 1s   |        |        |        |
|----------------|---------------------|---------|--------|--------|--------|--------|--------|--------|--------|
|                | Peak                | C1      | C2     | C3     | C4     | O1     | O2     | O3     | O4     |
| U <sub>b</sub> | Parameter           | C-C/C-H | C-OH   | O-C-O  | C(O)O  | C(O*)O | C-OH   | O-C-O  | C(O)O* |
| 7 V            | E <sub>b</sub> , eV | 285.38  | 286.73 | 288.06 | 288.84 | 531.3  | 532.9  | 533.48 | 534.3  |
|                | W, eV               | 2.1     | 2.1    | 2.1    | 2.1    | 1.8    | 1.8    | 1.8    | 1.8    |
|                | I <sub>rel</sub>    | 0.18    | 0.54   | 0.11   | 0.18   | 0.13   | 0.45   | 0.30   | 0.13   |
| 0 V            | E <sub>b</sub> , eV | 285.38  | 286.73 | 288.06 | 288.76 | 531.3  | 532.91 | 533.49 | 534.3  |
|                | W, eV               | 2.1     | 2.1    | 2.1    | 2.1    | 1.8    | 1.8    | 1.8    | 1.8    |
|                | I <sub>rel</sub>    | 0.22    | 0.51   | 0.10   | 0.17   | 0.11   | 0.47   | 0.31   | 0.11   |
| -7 V           | E <sub>b</sub> , eV | 285.53  | 286.73 | 288.06 | 288.76 | 531.44 | 532.93 | 533.51 | 534.00 |
|                | W, eV               | 2.1     | 2.1    | 2.1    | 2.1    | 1.8    | 1.75   | 1.79   | 1.8    |
|                | I <sub>rel</sub>    | 0.19    | 0.53   | 0.11   | 0.17   | 0.13   | 0.44   | 0.30   | 0.13   |

**Table S3.** Parameters of peaks in C 1s photoelectron spectra of Ag NPs/HBPAPES/cotton: E<sub>b</sub> – binding energy, W – peak width and I<sub>rel</sub> – relative intensity.

|                |                     | C 1s  |         |       |        |       |       |       | Si 2p <sub>3/2</sub> |                  |                    | N 1s              |       | Ag 3d <sub>5/2</sub> | Ag 3d <sub>3/2</sub> |
|----------------|---------------------|-------|---------|-------|--------|-------|-------|-------|----------------------|------------------|--------------------|-------------------|-------|----------------------|----------------------|
| U <sub>b</sub> | Group               | C-Si  | C-C/C-H | C-N   | C-O-Si | C-OH  | O-C-O | C(O)O | Si <sup>4+</sup>     | Si <sup>3+</sup> | Si <sup>4+</sup> * | C-NH <sub>2</sub> | *     | Ag <sup>2+</sup>     | Ag <sup>2+</sup>     |
| 0 V            | E <sub>b</sub> , eV | 284.2 | 284.8   | 285.7 | 286.2  | 286.7 | 288.0 | 288.8 | 102.4                | 104.1            |                    | 399.1             | 400.9 | 367.7                | 373.7                |
|                | W, eV               | 1.68  | 1.5     | 1.60  | 1.85   | 1.7   | 1.7   | 1.75  | 1.8                  | 1.8              |                    | 1.92              | 1.92  | 1.97                 | 2.04                 |
|                | I <sub>rel</sub>    | 0.18  | 0.36    | 0.18  | 0.18   | 0.05  | 0.01  | 0.04  | 0.9                  | 0.1              |                    | 0.81              | 0.10  | 0.59                 | 0.41                 |
| 7 V            | E <sub>b</sub> , eV | 284.2 | 284.8   | 285.7 | 286.2  | 286.7 | 288.0 | 288.5 | 102.3                | 103.9            | 99.8               | 399.0             | 401.2 | 367.6                | 373.5                |
|                | W, eV               | 1.68  | 1.50    | 1.60  | 1.83   | 1.7   | 1.7   | 1.75  | 1.8                  | 1.8              | 1.8                | 1.88              | 1.89  | 1.96                 | 2.00                 |
|                | I <sub>rel</sub>    | 0.18  | 0.36    | 0.18  | 0.18   | 0.05  | 0.01  | 0.03  | 0.77                 | 0.12             | 0.11               | 0.88              | 0.12  | 0.6                  | 0.4                  |

\* - differential charging
